# Supplementary material for: Methylation of CYP1A1 and VKORC1 promoter associated with stable dosage of warfarin in Chinese patients
Source: PeerJ journal article supplement (doi:10.7717/peerj.11549), 2021-06-22
Supplement: Supplementary_File_S2.pdf [file Supplementary_File_S2.pdf]

# Low-High

1a

# Medum-High

1b

# Low-Medium

1c

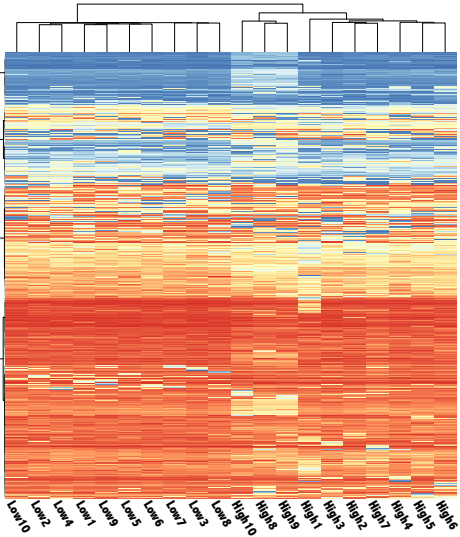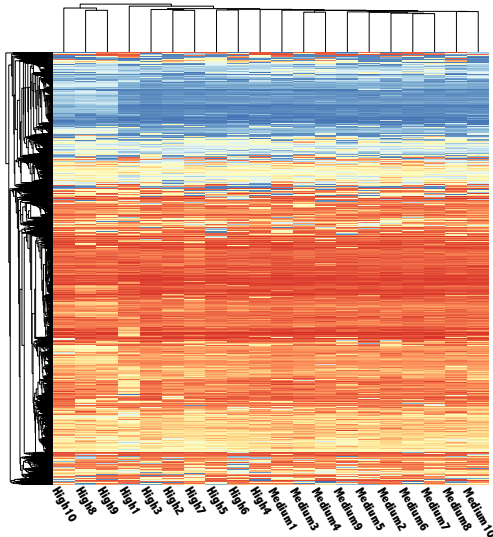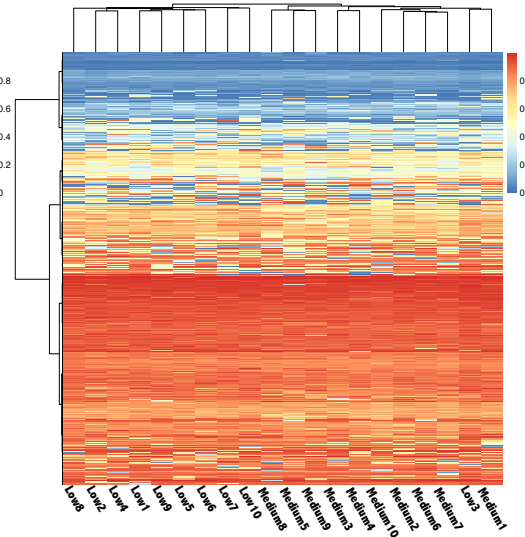

2a

2b

2c

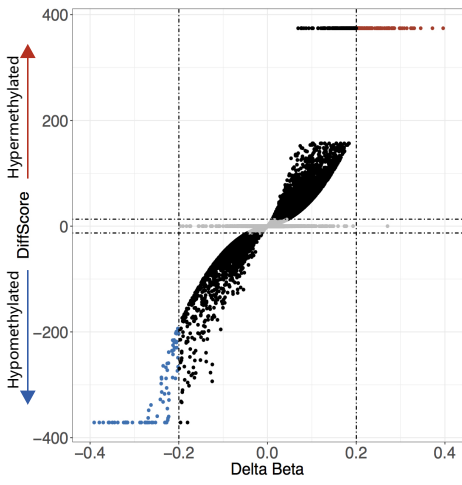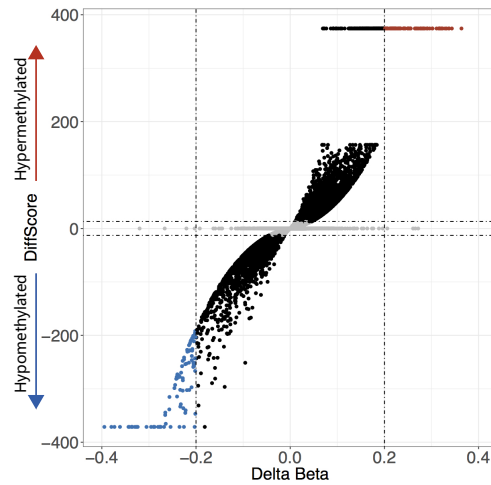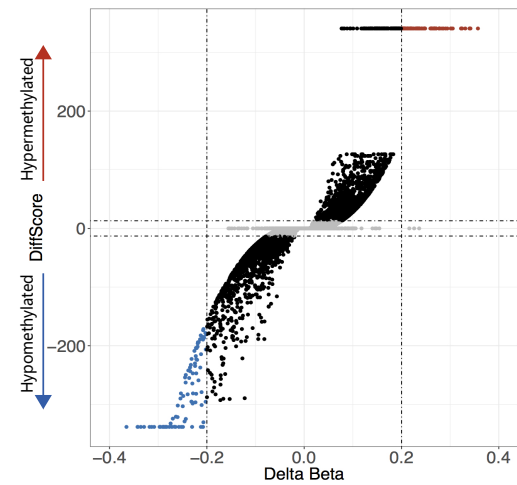

3a

3b

3c

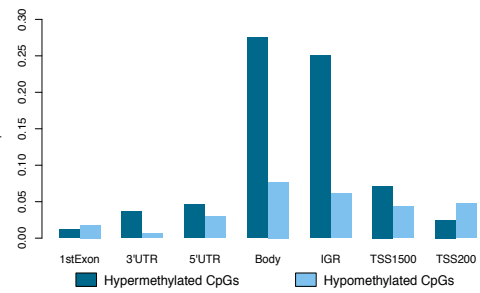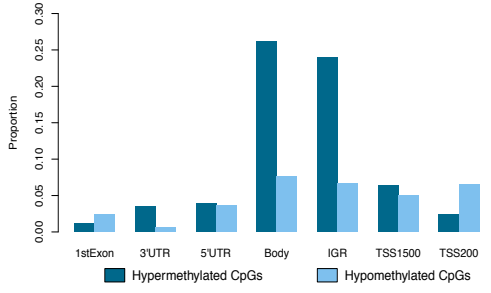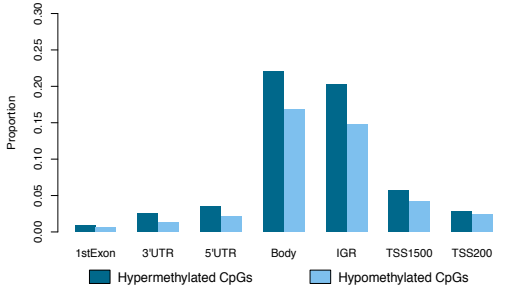

4a

4b

4c

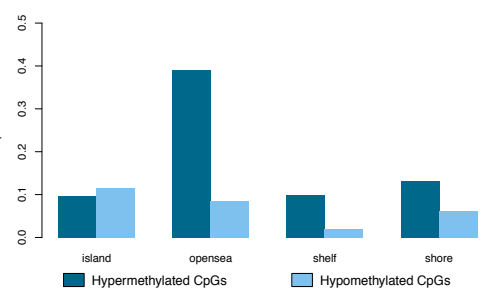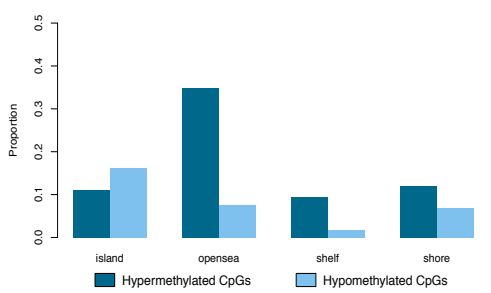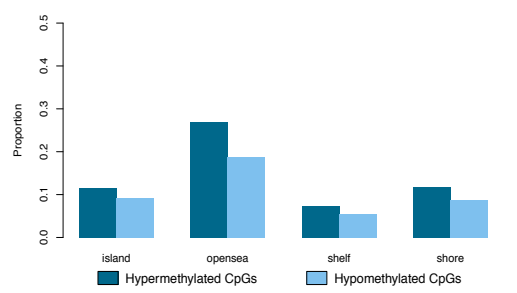

5a

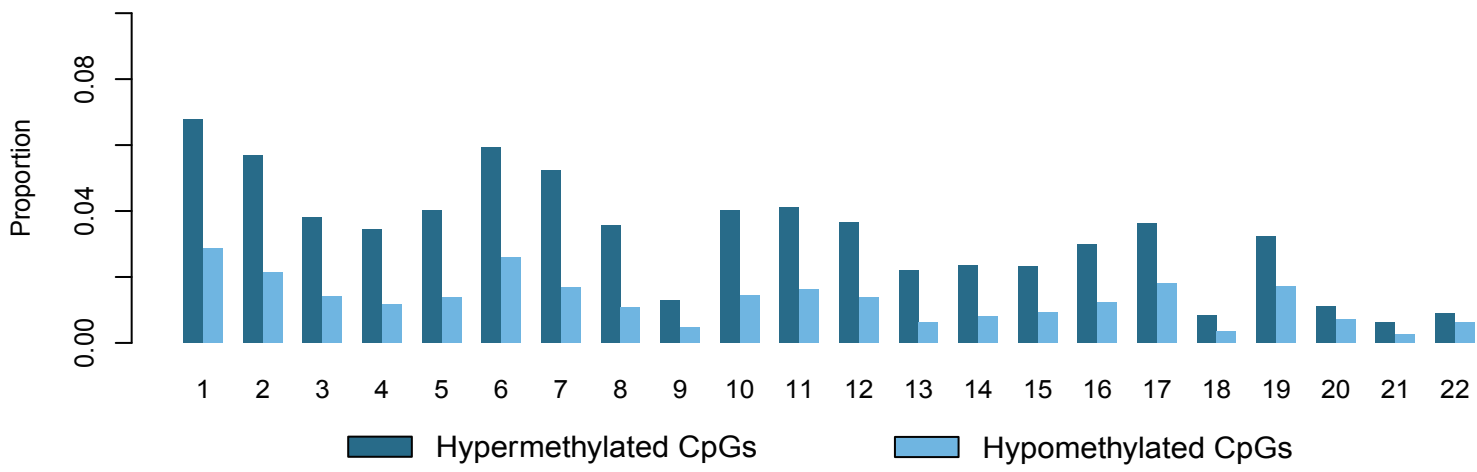

5b

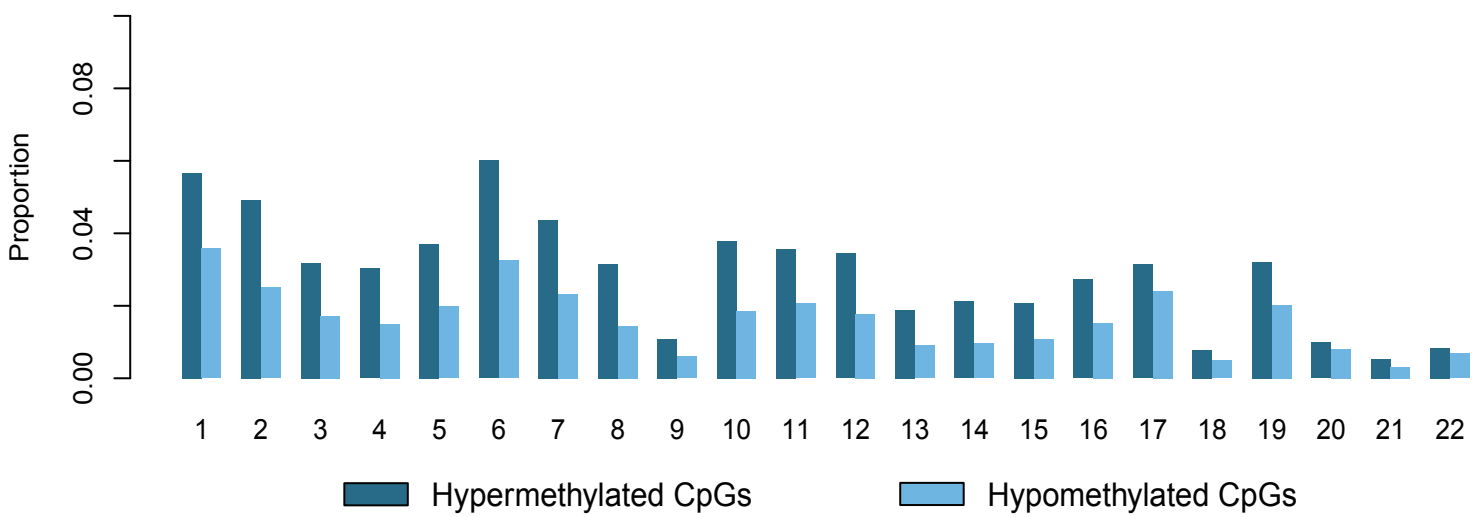

5c

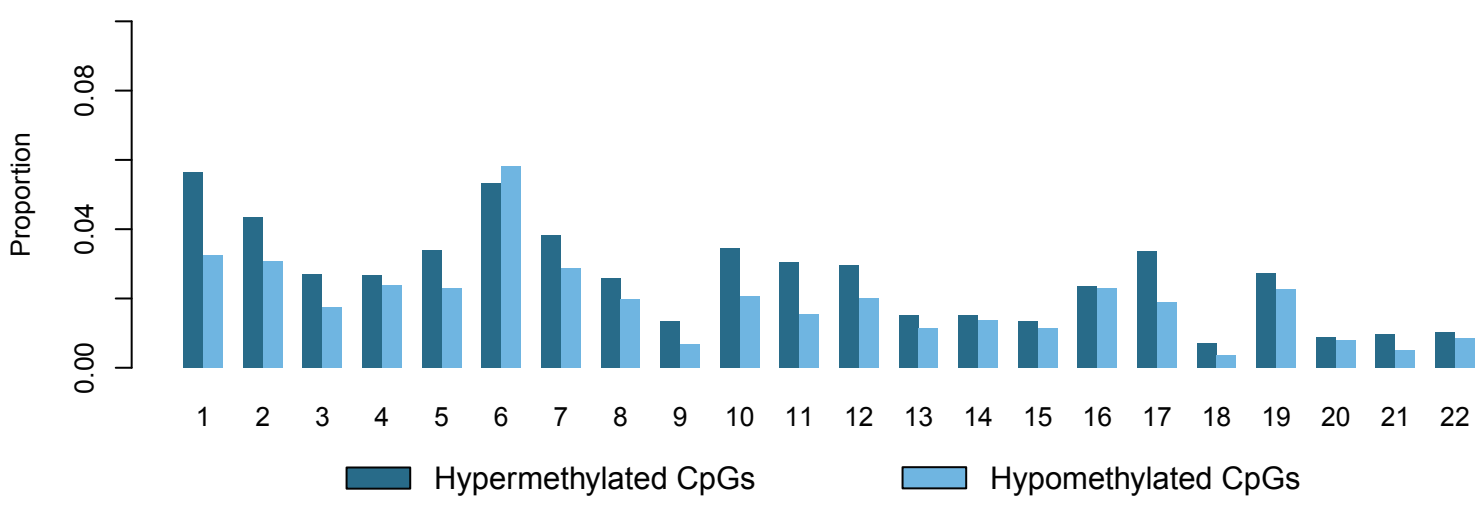

1a, 1b and 1c: the heatmap of hierarchical clustering for samples and CpGs (Low-High, Medium-High, and Low-Medium).

2a, 2b and 2c: the Volcano plot depicts the genome-wide distribution of hypo- and hypermethylated CpGs based on their  $\Delta\beta$  and DiffScore (Low-High, Medium-High, and Low-Medium).

3a, 3b and 3c: the bar chart represents the distribution of the differential CpGs of the genomic region (Low-High, Medium-High, and Low-Medium).

4a, 4b and 4c: the bar chart represents the distribution of the differential CpGs of the CpG island region (Low-High, Medium-High, and Low-Medium).

5a, 5b and 5c: the bar chart represents the distribution of the differential CpGs of the chromosomes (Low-High, Medium-High, and Low-Medium).
